# Supplementary material for: Clinical Implications of “Tailored” Antiplatelet Therapy in Patients With Chronic Total Occlusion
Source: PubMed Central journal article supplement — J Am Heart Assoc. 2020 Feb 11;9(4):e014676. doi: 10.1161/JAHA.119.014676 (PMC7070214; doi:10.1161/jaha.119.014676), 2020-02-11
Supplement: JAH3-9-e014676-s001.pdf [file JAH3-9-e014676-s001.pdf]

# **SUPPLEMENTAL MATERIAL**

**Table S1. Baseline Characteristics.**

|                           | HPR patients | Clopidogrel | Ticagrelor/Prasugrel | p value |
|---------------------------|--------------|-------------|----------------------|---------|
|                           | n=196        | n=114       | n=82                 |         |
| Age (years)               | 70.5±10.1    | 69.9±11.2   | 71.4±10.0            | 0.322   |
| ≥75 years                 | 77 (39)      | 44 (39)     | 33 (40)              | 0.466   |
| Male sex, (%)             | 160 (82)     | 91(80)      | 69 (84)              | 0.281   |
| Hypertension, (%)         | 131 (67)     | 68 (60)     | 63 (77)              | 0.008   |
| Hypercholesterolemia, (%) | 127 (65)     | 73 (64)     | 54 (66)              | 0.457   |
| Diabetes, (%)             | 66 (34)      | 38 (33)     | 28 (34)              | 0.513   |
| CKD, (%)                  | 24 (12)      | 16 (14)     | 8 (10)               | 0.250   |
| Previous MI, (%)          | 103 (53)     | 64 (56)     | 39 (48)              | 0.149   |
| Previous PCI, (%)         | 79 (40)      | 42 (37)     | 37 (45)              | 0.154   |
| Previous CABG, (%)        | 35 (18)      | 21 (18)     | 14 (17)              | 0.481   |
| ACS, (%)                  | 49 (25)      | 29 (25)     | 20 (24)              | 0.867   |
| LVEF < 0.40, (%)          | 67 (34)      | 45 (39)     | 22 (27)              | 0.045   |
| Multivessel disease, (%)  | 174 (89)     | 99 (87)     | 75 (91)              | 0.219   |
| Three-vessel disease, (%) | 106 (54)     | 58 (51)     | 48 (58)              | 0.180   |
| LAD CTO (%)               | 59 (30)      | 29 (25)     | 30 (37)              | 0.065   |

Values are mean ± SD and number of patients (%).

ACS = acute coronary syndrome; CABG = coronary artery bypass grafting; CKD = chronic kidney disease; CTO = chronic total occlusion; DES = drug-eluting stent; HPR= high platelet reactivity; LAD = left anterior descending artery; LVEF = left ventricular ejection fraction; MI = myocardial infarction; PCI = percutaneous coronary intervention; SD = standard deviation.
